# Supplementary material for: Highly sensitive polyaniline-coated fiber gas sensors for real-time monitoring of ammonia gas
Source: Royal Society of Chemistry journal article supplement (doi:10.1039/c9ra04005f), 2019-01-01
Supplement: c9ra04005f1.pdf [file c9ra04005f1.pdf]

## Supplementary Information for

### Highly sensitive polyaniline-coated fiber gas sensors for real-time monitoring of ammonia gas

Naraporn Indarit,<sup>a</sup> Yong-Hoon Kim,<sup>bc</sup> Nattasamon Petchsang<sup>\*de</sup> and Rawat Jaisutti<sup>\*a</sup>

<sup>a</sup>. Department of Physics, Faculty of Science and Technology, Thammasat University, Pathumthani 12121, Thailand.

E-mail: jrawat@tu.ac.th

<sup>b</sup>. School of Advanced Materials Science and Engineering, Sungkyunkwan University, Suwon 440746, Korea.

<sup>c</sup>. SKKU Advanced Institute of Nanotechnology (SAINT), Sungkyunkwan University, Suwon 440746, Korea.

<sup>d</sup>. Department of Materials Science, Faculty of Science, Kasetsart University, Bangkok 10900, Thailand. E-mail: nattasamon.p@ku.ac.th

<sup>e</sup>. Specialized Center of Rubber and Polymer Materials for Agriculture and Industry (RPM), Faculty of Science, Kasetsart University, Bangkok 10900, Thailand

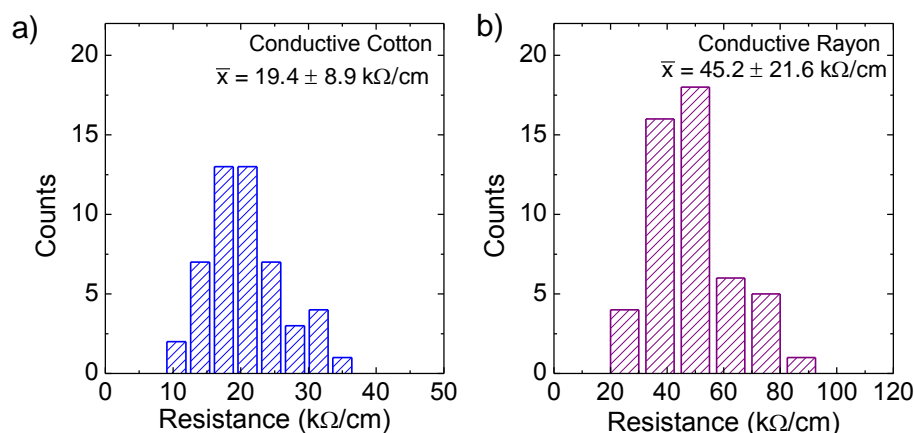

**Fig. S1** Histograms of a) conductive cotton and b) conductive rayon without adding ethylene glycol.

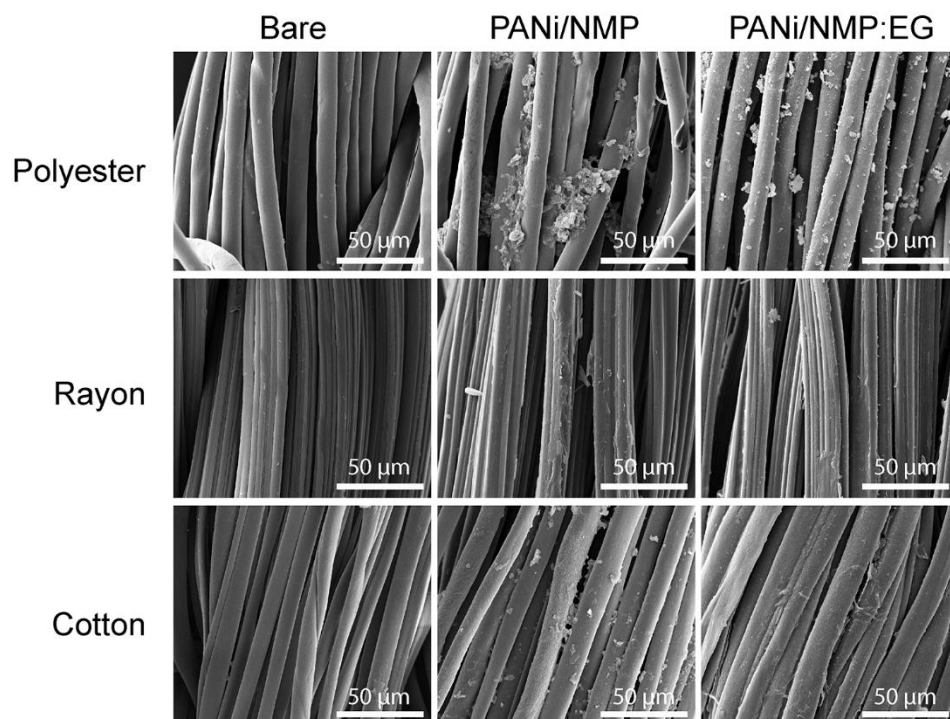

**Fig. S2** Low magnification SEM images of bare and coated yarns.

**Table S1** FTIR table of functional group and its wave number.

| Wavenumber (cm <sup>-1</sup> ) | Assignments                                              |
|--------------------------------|----------------------------------------------------------|
| 3332, 3333                     | O-H stretching                                           |
| 2968                           | C-H stretching                                           |
| 2917, 2892                     | C-H symmetric stretching                                 |
| 1714                           | C=O stretching                                           |
| 1643,1633                      | O-H bending                                              |
| 1594,1593,1592                 | C=N Stretching of quinoid ring (polyaniline)             |
| 1505                           | Aromatic ring C=C stretching                             |
| 1504, 1498,1496                | C-N stretching of benzenoid ring (polyaniline)           |
| 1424, 1408, 1365, 1364, 1338   | C-H bending                                              |
| 1313                           | O-H in plane bending                                     |
| 1240                           | Ester's C-O stretching                                   |
| 1155, 1025, 1016, 893          | C-O stretching in C-O-C and C-O-H fragments              |
| 1094                           | C-O stretching                                           |
| 871                            | Aromatic ring C-H bending                                |
| 723                            | C-H bending (C-H rocking in C-CH <sub>2</sub> -fragment) |
| 667,607,609                    | O-H out-of-plane bending                                 |

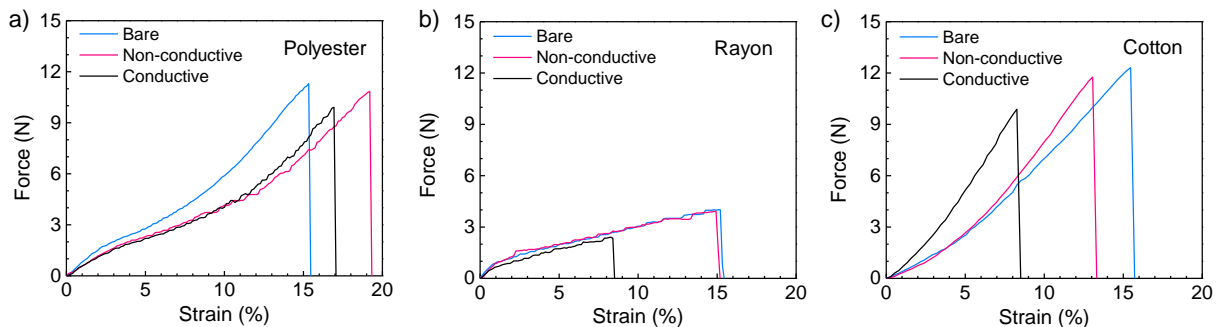

**Fig. S3** Relating force and strain of bare yarns, coated non-conductive form of PANi (PANi-EB) and conductive form of PANi (PANi-ES) on a) polyester, b) rayon and c) cotton yarns.

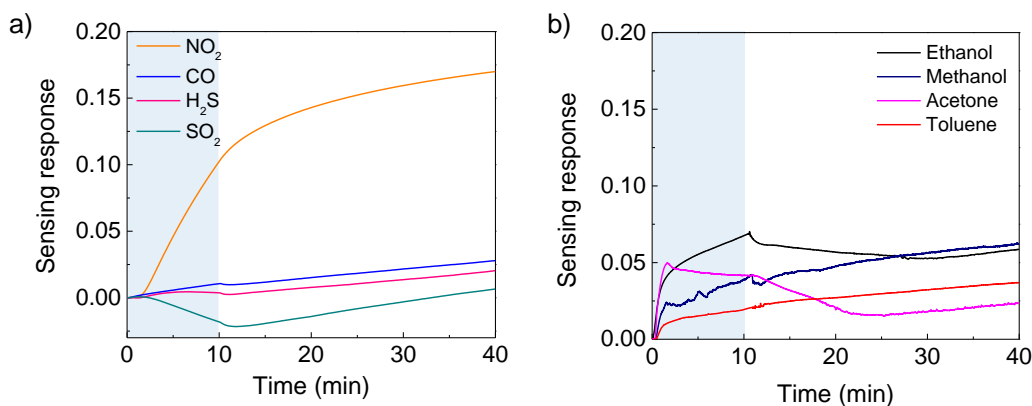

**Fig. S4** The sensing response ( $S=(R_g-R_0)/R_0$ ) of a) toxic gases and b) common solvents under conductive polyester yarn based gas sensor.

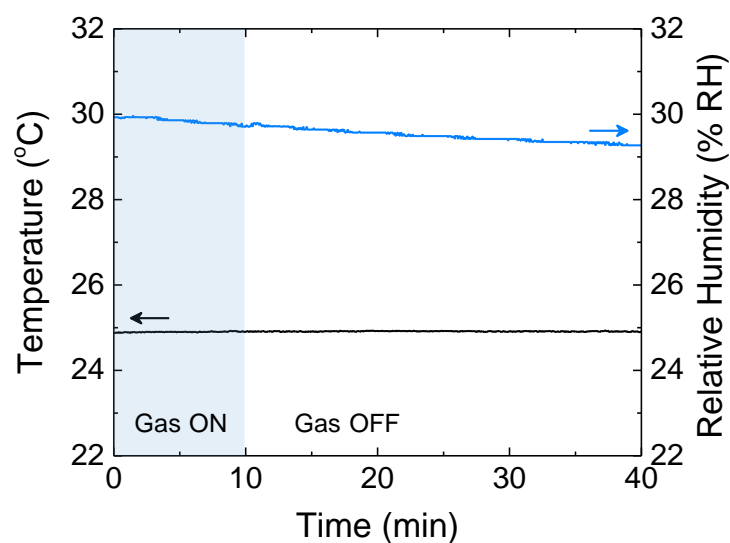

**Fig. S5** Operating temperature and relative humidity of conductive polyester sensor during exposure to 50 ppm of  $\text{NH}_3$  gas for 10 mins and cleaning with synthetic air for 30 mins.

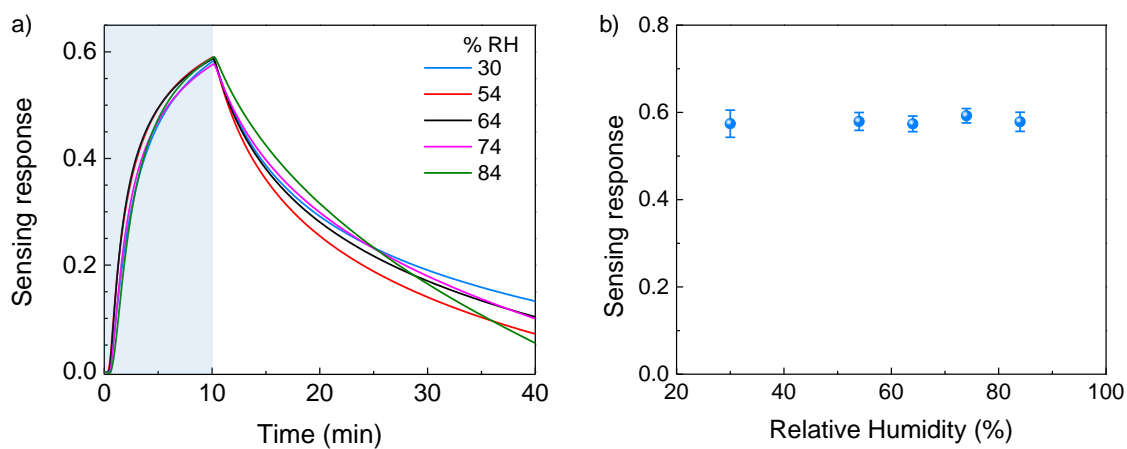

**Fig. S6** a) Sensing response as a function of time of conductive polyester sensor under 50 ppm ammonia exposure and under different relative humidity environment. b) Maximum sensing response of conductive polyester yarn with different relative humidity operation.

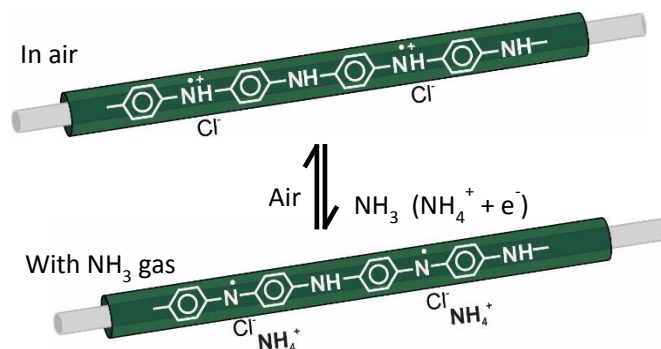

**Fig. S7** Schematic of ammonia sensing mechanism.

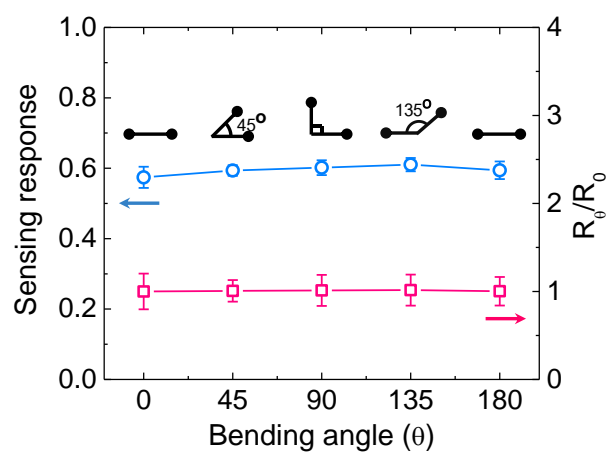

**Fig. S8** Measuring sensing response (blue color) and relative sensor resistance (magenta color) under different bending angle ( $R_\theta$  is sensor resistance at specific bending angle and  $R_0$  is sensing resistance before exposure to the  $\text{NH}_3$  gas).

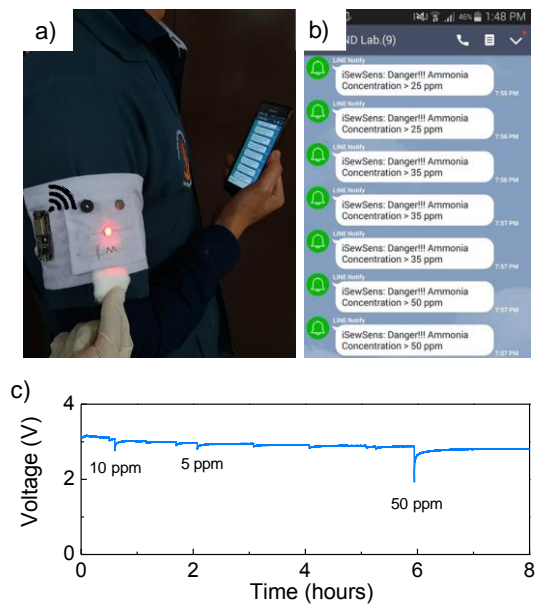

**Fig. S9** a) Photograph image of conductive polyester yarn sensor as an armband. b) The gas sensor results and alarm messages on mobile application. c) Real-time voltage measurement (drop and recovery) during exposure to different concentration of ammonia gas.
